1 **CO-DESIGNING A DIGITAL HEALTH APP TO MANAGE PAIN IN YOUNG**  
2 **CHILDREN WITH CANCER: REPORT FROM THE GENERATIVE DESIGN PHASE**  
3 **OF INTERVENTION DEVELOPMENT**  
4

5 Lindsay A. Jibb RN PhD<sup>1,2\*</sup>, Surabhi Sivaratnam BHSc<sup>2,3\*</sup>, Elham Hashemi MA<sup>2</sup>, Jennifer N.  
6 Stinson RN-EC PhD<sup>1,2</sup>, Paul C. Nathan MD MSc<sup>1,2</sup>, Julie Chartrand RN PhD<sup>4,5</sup>, Nicole M.  
7 Alberts PhD<sup>6</sup>, Tatenda Masama BScN<sup>2</sup>, Hannah G. PeaseBA<sup>7</sup>, Lessley B. Torres BA<sup>7,8,9</sup>, Haydee  
8 G. Cortes BA<sup>7,8,9</sup>, Mallory Zworth BScN<sup>2</sup>, Susan Kuczynski<sup>10</sup>, Michelle A. Fortier PhD<sup>7,8,9</sup>.

9  
10 <sup>1</sup>University of Toronto, Toronto, Canada; <sup>2</sup>Hospital for Sick Children, Toronto, Canada; <sup>3</sup>Faculty  
11 of Medicine, McMaster University, Hamilton, Canada; <sup>4</sup>Faculty of Health Sciences, University  
12 of Ottawa, Ottawa, Canada; <sup>5</sup>Children's Hospital of Eastern Ontario, Ottawa, Canada;  
13 <sup>6</sup>Concordia University, Montreal, Canada; <sup>7</sup>University of California Irvine, Irvine, USA;  
14 <sup>8</sup>CHOC Children's Hospital, Orange, USA; <sup>9</sup>UCI Center on Stress and Health, Orange, USA;  
15 <sup>10</sup>Ontario Parents Advocating for Children with Cancer, Toronto, Canada.  
16

17 **Address correspondence to:**

18 Lindsay Jibb  
19 Child Health Evaluative Sciences  
20 Hospital for Sick Children  
21 686 Bay Street, M5G 0A4  
22 Toronto Canada  
23 [lindsay.jibb@sickkids.ca](mailto:lindsay.jibb@sickkids.ca)  
24 416-813-7654 x309160  
25

26 \*, These authors contributed equally to this work.  
27

28 **Author email addresses:**

|                    |                                                                                  |
|--------------------|----------------------------------------------------------------------------------|
| Lindsay Jibb       | <a href="mailto:lindsay.jibb@sickkids.ca">lindsay.jibb@sickkids.ca</a>           |
| Surabhi Sivaratnam | <a href="mailto:surabhi.sivartnam@sickkids.ca">surabhi.sivartnam@sickkids.ca</a> |
| Elham Hashemi      | <a href="mailto:elham.hashemi@sickkids.ca">elham.hashemi@sickkids.ca</a>         |
| Jennifer Stinson   | <a href="mailto:jennifer.stinson@sickkids.ca">jennifer.stinson@sickkids.ca</a>   |
| Paul Nathan        | <a href="mailto:paul.nathan@sickkids.ca">paul.nathan@sickkids.ca</a>             |
| Julie Chartrand    | <a href="mailto:julie.chartrand@uottawa.ca">julie.chartrand@uottawa.ca</a>       |
| Nicole Alberts     | <a href="mailto:nicole.alberts@concordia.ca">nicole.alberts@concordia.ca</a>     |
| Tatenda Masama     | <a href="mailto:tatenda.masama@sickkids.ca">tatenda.masama@sickkids.ca</a>       |
| Hannah Pease       | <a href="mailto:peaseh@uci.edu">peaseh@uci.edu</a>                               |
| Lessley Torres     | <a href="mailto:lessleyt@hs.uci.edu">lessleyt@hs.uci.edu</a>                     |
| Haydee Cortes      | <a href="mailto:cortesh@hs.uci.edu">cortesh@hs.uci.edu</a>                       |
| Susan Kuczynski    | <a href="mailto:liasion@opacc.org">liasion@opacc.org</a>                         |
| Mallory Zworth     | <a href="mailto:mallory.zworth@sickkids.ca">mallory.zworth@sickkids.ca</a>       |
| Michelle Fortier   | <a href="mailto:mfortier@hs.uci.edu">mfortier@hs.uci.edu</a>                     |

29 **Data availability statement:** Data from this study are available (in accordance with institutional  
30 policies) from the corresponding author upon request.

31 **Funding statement:** We acknowledge the financial support of the Rally Foundation for  
32 Childhood Cancer Research, [19YIN48].

33 **Conflict of interest disclosure:** None to disclose.

34 **Ethics approval statement:** This study received ethics approval from the institutional review  
35 boards at the Hospital for Sick Children (#1000064500) and the University of California, Irvine  
36 (#190666).

37 **Patient consent statement:** All parent participants provided informed consent to participate  
38 before any involvement in this study.

39 **Abbreviations:**

40 CHOC, Children's Hospital of Orange County

41 PPEP, Parental Pain Expression Perceptions

42 SickKids, The Hospital for Sick Children

43

44 **Short title:** Co-design of a parent-led childhood cancer pain app

45

46

47

48

49

50

51

52

53

54

55

56

57

58

59

## ABSTRACT

60

61 Pain is one of the most prevalent and burdensome pediatric cancer symptoms for young children  
62 and their families. A significant proportion of pain episodes are experienced in environments  
63 where management options are limited, including at home, and digital innovations such as apps  
64 may have positive impacts on pain outcomes for young children in these environments. Our  
65 overall aim is to co-design such an app and the objective of this study was to explore the  
66 perceptions of children’s parents about app utility, needed system features, and challenges. We  
67 recruited parents of young children with cancer and multidisciplinary pediatric oncology  
68 clinicians from two pediatric cancer care centers to participate in audio-recorded, semi-structured  
69 co-design interviews. We conducted interviews until data saturation was reached. Audio-  
70 recordings were then transcribed, coded, and analyzed using thematic analysis. Forty-two  
71 participants took part in the process. Participants endorsed the concept of an app as a useful, safe,  
72 and convenient way to engage caregivers in managing their young child’s pain. The value of the  
73 app related to its capacity to provide real-time, multimodal informational and procedural pain  
74 support to parents, while also reducing the emotional burden of pain care. Recommendations for  
75 intervention design included accessibility-focused features, comprehensive symptom tracking,  
76 and embedded scientific- and clinically-sound symptom assessments and management advice.  
77 Predicted challenges associated with digital pain management related to potential burden of use  
78 for parents and clinicians. The insights gathered will inform the design principles of our future  
79 childhood cancer pain digital research.

80

81

## AUTHOR SUMMARY

82 The lack of meaningful involvement of end-users in intervention development has been a key  
83 contributor to difficulties in effectively translating research findings into cancer practice and  
84 policy. There is a risk that without the active engagement of children with cancer and their  
85 families in designing digital health innovations, researchers and clinicians will fall victim to an  
86 unfortunate cycle of producing underutilized evidence—resulting in a limited impact on patient  
87 outcomes. Pain is a particular problem for young children with cancer and real-time digital  
88 health interventions may be solutions for accessible, effective, and scalable cancer pain  
89 management. We are using an established end user-centered co-design process to engage parents  
90 and pediatric oncology clinicians in the development of a cancer pain management app. Our  
91 work here summarizes the generative co-design phase of this process and the perceptions of  
92 parents and clinicians related to app usefulness and needed system features.

93

94

95

96

97

98 **INTRODUCTION**

99

100 Pain is one of the most prevalent and burdensome pediatric cancer symptoms for children  
101 and their families despite the existence of evidence-based treatment guidelines (1,2). The  
102 negative consequences of childhood cancer pain are many and include reduced child health-  
103 related quality of life, increased child and family distress, chronic pain in survivorship and the  
104 potential for significant financial costs to healthcare systems and families (3–6). Further, shifts to  
105 increasingly outpatient-based cancer care mean that children with cancer are experiencing pain in  
106 environments, such as home or school, where treatment options are limited (7).

107 Young children with cancer, including toddlers, preschoolers, and school-aged children,  
108 are particularly vulnerable to undermanaged pain due to their limited ability for pain self-report  
109 and their reliance on caregivers for pain management and treatment. Current research shows that  
110 digital innovations such as real-time smartphone-based pain management support apps may have  
111 positive impacts on pain outcomes in adolescents with cancer (5,8–10), but no investigations  
112 have been conducted into such tools for managing pain in young children with cancer, especially  
113 outside the hospital setting.

114 To increase the likelihood of successful implementation of digital health interventions  
115 within pediatric cancer care, it is vital that the key stakeholders, including parents, other family  
116 caregivers and clinicians, are meaningfully integrated in the processes of intervention design,  
117 development, and evaluation. Evidence shows that eliciting stakeholder perspectives, including  
118 that of parents, on intervention development supports the identification of barriers to use, results

119 in interventions with enhanced perceived effectiveness, and facilitates the successful delivery of  
120 digital health interventions (11–13).

121 The current study is part of a phased approach to the development and evaluation of a  
122 digital health app for the parent-led management of young children’s cancer pain. Our process  
123 employed a co-design framework, which has been successfully used to develop pediatric health  
124 innovations (14). This study describes the generative design phase of innovation development  
125 wherein the healthcare needs of participants, including latent needs that participants may not be  
126 aware of, are explored and revealed. Our future co-design efforts will build on these results  
127 during the software development and co-evaluation of a high-fidelity app prototype with family  
128 caregivers.

### 129 *Objective*

130 Given the issue of undermanaged pain in young children with cancer and the critical need  
131 to elicit stakeholders input early in the process of successful digital health intervention design,  
132 the objective of this study was to explore the perceptions of children’s parents and clinicians as  
133 they pertain to a the co-design of a parent-led real-time cancer pain management app, including  
134 possible utility, recommendations for needed system features, and potential challenges to  
135 implementation.

136

## 137 **RESULTS**

138

### 139 *Study sample*

140 A total of 42 participants—21 parents and 21 clinicians—were interviewed between December  
141 2019 and September 2020. All eligible participants who were approached agreed to participate.

142 The mean (range) total interview times were 33 (14-67) minutes and 33 (22-45) minutes for  
 143 parents and clinicians, respectively. Participant characteristics are shown in **Table 1**. Most  
 144 parents were within the 30-39 years of age category (n=13, 62%) and mothers (n=17, 81%). The  
 145 mean parent-reported PPEP scores were 33 (SD=10), indicating moderately low child pain  
 146 misconceptions. Clinicians were most often registered nurses (n=9, 43%) and had a mean  
 147 average 10 years of clinical experience.

148 **Table 1.** Participant characteristics  
 149

| Characteristic                                             | n       | M(SD)   |
|------------------------------------------------------------|---------|---------|
| Pain perception knowledge and attitudes (total PPEP score) |         | 33 (10) |
| Caregiver type                                             |         |         |
| <i>Mother</i>                                              | 17 (81) |         |
| <i>Father</i>                                              | 3 (14)  |         |
| <i>Stepmother</i>                                          | 1 (5)   |         |
| Marital status                                             |         |         |
| <i>Married</i>                                             | 19 (90) |         |
| <i>Divorced</i>                                            | 1 (5)   |         |
| <i>Single</i>                                              | 1 (5)   |         |
| Sex                                                        |         |         |
| <i>Female</i>                                              | 18 (86) |         |
| <i>Male</i>                                                | 3 (14)  |         |
| Age range (years)                                          |         |         |
| 20-29                                                      | 3 (14)  |         |
| 30-39                                                      | 13 (62) |         |
| 40-49                                                      | 5 (24)  |         |
| Parent-identified race or ethnicity                        |         |         |
| <i>White</i>                                               | 8 (38)  |         |
| <i>Hispanic/Latinx</i>                                     | 5 (24)  |         |
| <i>Chinese</i>                                             | 2 (10)  |         |
| <i>South Asian</i>                                         | 2 (10)  |         |
| <i>Arab</i>                                                | 1 (5)   |         |
| <i>Armenian</i>                                            | 1 (5)   |         |
| <i>Black</i>                                               | 1 (5)   |         |
| <i>Korean</i>                                              | 1 (5)   |         |
| Highest level of education                                 |         |         |
| <i>College/University</i>                                  | 9 (43)  |         |
| <i>Professional School/Graduate Degree</i>                 | 7 (33)  |         |
| <i>High School</i>                                         | 4 (19)  |         |
| <i>Teaching Credential</i>                                 | 1 (5)   |         |
| Primary language                                           |         |         |
| <i>English</i>                                             | 16 (76) |         |
| <i>Arabic</i>                                              | 1 (5)   |         |
| <i>Cantonese</i>                                           | 1 (5)   |         |
| <i>Korean</i>                                              | 1 (5)   |         |

|                                                     |          |           |
|-----------------------------------------------------|----------|-----------|
| <i>Tamil</i>                                        | 1 (5)    |           |
| <i>Urdu</i>                                         | 1 (5)    |           |
| Child age (years)                                   |          | 5.3 (2.7) |
| Child cancer diagnosis                              |          |           |
| <i>ALL</i>                                          | 9 (43)   |           |
| <i>AML</i>                                          | 4 (19)   |           |
| <i>LCH</i>                                          | 2 (10)   |           |
| <i>Neuroblastoma</i>                                | 2 (10)   |           |
| <i>APML</i>                                         | 1 (5)    |           |
| <i>Lymphoma</i>                                     | 1 (5)    |           |
| <i>MYH9 disorder</i>                                | 1 (5)    |           |
| <i>Osteosarcoma</i>                                 | 1 (5)    |           |
| Time since child diagnosis (years)                  |          | 0.9 (1.4) |
| <b>Clinicians</b>                                   |          |           |
| Profession                                          |          |           |
| <i>Advanced Practice Nurse</i>                      | 5 (24)   |           |
| <i>Oncologist</i>                                   | 1 (5)    |           |
| <i>Physical Therapist</i>                           | 3 (14)   |           |
| <i>Psychologist</i>                                 | 1 (5)    |           |
| <i>Registered Nurse</i>                             | 9 (43)   |           |
| <i>Social Worker</i>                                | 2 (10)   |           |
| Sex                                                 |          |           |
| <i>Female</i>                                       | 21 (100) |           |
| <i>Male</i>                                         | 0 (0)    |           |
| Age range (years)                                   |          |           |
| <i>20-29</i>                                        | 7 (33)   |           |
| <i>30-39</i>                                        | 8 (38)   |           |
| <i>40-49</i>                                        | 5 (24)   |           |
| <i>50-59</i>                                        | 1 (5)    |           |
| Highest level of education                          |          |           |
| <i>Bachelor's Degree</i>                            | 7 (33)   |           |
| <i>Master's Degree</i>                              | 10 (48)  |           |
| <i>Doctoral Degree</i>                              | 3 (14)   |           |
| <i>Medical Degree</i>                               | 1 (5)    |           |
| Clinical work experience (years)                    |          | 10(9)     |
| Pediatric oncology clinical work experience (years) |          | 8(8)      |

150

### 151 *Thematic analysis*

152 We organized our data into four major themes to describe parent and clinician perceptions of the  
153 utility of digital cancer pain intervention, recommendations for intervention components, and  
154 potential implementation challenges. **Table 2** shows themes, subthemes, and example narrative  
155 quotes.

156 **Table 2.** Thematic analysis framework

|                                                                        | Theme                                                                           | Sub-theme                                                                                                                                                                                                                                                                                    | Parent representative quotes                                                                                                                                                                                                                                                                               | Clinician representative quotes                                                                                                                                                                                                                                                                                                                                                                    |
|------------------------------------------------------------------------|---------------------------------------------------------------------------------|----------------------------------------------------------------------------------------------------------------------------------------------------------------------------------------------------------------------------------------------------------------------------------------------|------------------------------------------------------------------------------------------------------------------------------------------------------------------------------------------------------------------------------------------------------------------------------------------------------------|----------------------------------------------------------------------------------------------------------------------------------------------------------------------------------------------------------------------------------------------------------------------------------------------------------------------------------------------------------------------------------------------------|
| 1                                                                      | The need for and value of a digital cancer pain management intervention.        | Informational and procedural support for parents needed                                                                                                                                                                                                                                      | <p>“...If there’s a way of... teach[ing strategies and timing] to the parents and tell[ing] them that this is something that you could also do to help your son whenever he’s home or whenever he’s experiencing pain, that would be helpful.” (Mother of a 6-year-old)</p>                                | <p>“...I think sometimes when they go home, a think they might struggle with is [deciding] when do I give this morphine? Am I giving too much? Am I giving too little?...” (Nurse)</p> <p>“...Many times there are pain complaints that can be managed at home before you have to get to that threshold of coming in ...” (Nurse)</p>                                                              |
| Real-time interdisciplinary pain care needed                           |                                                                                 | <p>“It’s nice to feel connected [to the team] when you’re at home.” (Mother of a 4-year-old)</p>                                                                                                                                                                                             | <p>“[The app should] offer “real time” chat with a medical provider in case [parents] were not sure what to do specifically.” (Advanced practice nurse)</p>                                                                                                                                                |                                                                                                                                                                                                                                                                                                                                                                                                    |
| Means to negotiate the emotional burden of pain care on parents needed |                                                                                 | <p>“Yeah, and I can't apply that to her sometimes... like, I just can't do it. You know she's in pain or she's really sick or she's not in a good mood because of what's, what's happening and I just want something to help me get through this, you know?” (Mother, child age unknown)</p> | <p>“I think that it would be helpful because the parents are so overwhelmed and there’s so many things that they try and keep track of. There’s meds and chemotherapy and all that, so to have something dedicated to pain where it would also be easy to [track]... would be helpful to them” (Nurse)</p> |                                                                                                                                                                                                                                                                                                                                                                                                    |
| 2                                                                      | Recommendations pertaining to pediatric digital health interventions in general | Usability-related recommendations: (1) accessibility, (2) tracking capacity, and (3) gamification                                                                                                                                                                                            | <p>“Yeah, [gamified] challenges. I love them *laughs* and it makes you, you know, want to [engage] more...” (Mother, child age unknown)</p>                                                                                                                                                                | <p>“...We have a lot of patients that have come from different countries, and I guess it would be difficult for some parents to use an app, especially if it’s only provided in English...” (Nurse)</p> <p>“...We have a lot of patients that for the parents English is a second language. Even some patients, English is a second language for them so I think that’s a huge one...” (Nurse)</p> |
| Credibility-related recommendations: (1)                               |                                                                                 | <p>“I like the idea that...the nurse can contact [you]</p>                                                                                                                                                                                                                                   | <p>“Pain is subjective so it's hard to know what they're</p>                                                                                                                                                                                                                                               |                                                                                                                                                                                                                                                                                                                                                                                                    |



|                                                      |                                                                                             |                                                                                                                                                                                                                                                                                                                                                                           |                                                                                                                                                                                                   |                                                                                                                                                                                                                                                                                                                                                                                                                                                                                                                                                          |
|------------------------------------------------------|---------------------------------------------------------------------------------------------|---------------------------------------------------------------------------------------------------------------------------------------------------------------------------------------------------------------------------------------------------------------------------------------------------------------------------------------------------------------------------|---------------------------------------------------------------------------------------------------------------------------------------------------------------------------------------------------|----------------------------------------------------------------------------------------------------------------------------------------------------------------------------------------------------------------------------------------------------------------------------------------------------------------------------------------------------------------------------------------------------------------------------------------------------------------------------------------------------------------------------------------------------------|
|                                                      |                                                                                             | <i>clinician integration, (2) quality evidence base, (3) personalization, and (4) clinical disclaimer</i>                                                                                                                                                                                                                                                                 | <i>when it's for the extreme pain. It's a nice feature." (Mother of a 4-year-old)</i>                                                                                                             | <i>going to do with that but I think there should always be a disclaimer: "If you feel that you know you could try this, but if you feel the pain is escalating please call 9-1-1 or please take your child to the nearest emergency room" (Social worker)</i>                                                                                                                                                                                                                                                                                           |
| 3                                                    | <i>Recommendations pertaining to parent-led digital cancer pain management specifically</i> | <i>Detailed patient history</i>                                                                                                                                                                                                                                                                                                                                           | <i>"Weight, height...I would get that down...and then the feeding and pain management or the pain history." (Mother of a 2-year-old)</i>                                                          | <i>"...it would be helpful to know the symptoms. Like, a lot of times when a patient comes in, they don't have symptoms recorded ... Sometimes they'll say "Yeah they have pain"—sometimes we don't know. It's kind of vague when they tell us when they're feeling the pain, describing the pain, like, what it feels like, is it achy, is it sharp, is it shooting..." (Nurse)</i><br><br><i>"things that would cause pain, like their diagnosis, recent surgery or something or chronic history of pain or something that's a little bit" (Nurse)</i> |
| <i>Comprehensive pain assessments</i>                |                                                                                             | <i>"I think it would be helpful to track...when [the child] had treatment and associated pain. That could be helpful for collecting data for when these children are experiencing pain. That may be helpful also for researchers to link the pain management and help people better understand the real side effects of [cancer treatment]." (Mother of a 5-year-old)</i> | <i>"It's reall, really hard for young kids, but I think giving more adjectives that parents could use or other ways to describe different types of pain" (Physical therapist)</i>                 |                                                                                                                                                                                                                                                                                                                                                                                                                                                                                                                                                          |
| <i>Multimodal integrative pain management advice</i> |                                                                                             | <i>"Distraction things first. Like massage, hot packs, cold packs, and stuff like that." (Mother, child age unknown)</i>                                                                                                                                                                                                                                                  | <i>"...there's other pain management strategies that they can use at home that we don't use that much in the hospital, like relaxation and distraction and all that kind of stuff..." (Nurse)</i> |                                                                                                                                                                                                                                                                                                                                                                                                                                                                                                                                                          |

|   |                                                                                          |                                                                                |                                                                                                                                                                                                    |                                                                                                                                                                                                                                                                                                                                               |
|---|------------------------------------------------------------------------------------------|--------------------------------------------------------------------------------|----------------------------------------------------------------------------------------------------------------------------------------------------------------------------------------------------|-----------------------------------------------------------------------------------------------------------------------------------------------------------------------------------------------------------------------------------------------------------------------------------------------------------------------------------------------|
|   |                                                                                          | Capacity to track pain overtime                                                | “Yeah, to be able to track daily and not have ... have a place that we can consolidate that data ultimately.” (Father of 6-year-old)                                                               | “I think it would be useful as a tracking method because... there’s so many meds, so many chemos, so many appointments, that you kind of get lost in all of it. If there was ever a time that they need to come to [emergency] it would just be a really easy way to be like, “This is when my pain started...This is what they did.” (Nurse) |
| 4 | Predicted challenges associated with implementing a digital pain management intervention | Threshold-setting around when clinician-based support should be initiated      | “[When should doctors intervene in parent pain management at home?] Sometimes, but it just depends. Depends on [the] situation, okay?” (Mother, child age unknown)                                 | “I think that’s what’s hard, because pain is very subjective, and...so I think that’s where it’s hard to pinpoint [when the healthcare team should be alerted].” (Advanced practice nurse)                                                                                                                                                    |
|   |                                                                                          | Introduction of a new burden on parents                                        | No relevant quotes                                                                                                                                                                                 | “But if they never heard of that technique before...are they going to be wasting time thinking, “...What’s that? What does that mean? How do you do that breathing? What does relaxation mean?” Like, right? Is that going to add more stress?” (Social worker)                                                                               |
|   |                                                                                          | Difficulty in integrating into clinician workflows                             | “And I can’t imagine anyone here has an easy or laid-back position. I imagine everybody’s role here is pretty impactful and a lot of you are busy most of the time so...” (Mother of a 2-year-old) | “I think in an ideal that’d be like a great idea and stuff like that I just don’t know who would take on that responsibility, like the best person I can think of would be like [the family’s primary] nurse but I also know that they’re so busy with other things.” (Nurse)                                                                 |
|   |                                                                                          | Potential to results in family hyperawareness of and sensitization to symptoms | No relevant quotes                                                                                                                                                                                 | “I’ve experienced some parents being hyper vigilant.” (Social worker)                                                                                                                                                                                                                                                                         |

157

158 *The need for and value of a digital cancer pain management intervention.*

159 Both parents and caregivers considered a pain management app as a useful, safe, and

160 convenient way to empower caregivers to effectively manage their young child’s pain in the

161 home environment, especially for parents of children newly diagnosed with cancer. Several  
162 current deficiencies with at-home pain management for young children were also discussed.  
163 Informational and procedural support for parents was needed and valued. Both groups noted that  
164 parents already possessed a strong suite of child pain management skills, but a means to support  
165 the implementation of this knowledge “would be helpful” (Mother of a 6-year-old). Clinicians  
166 described current clinical practices of learning about young children’s cancer pain as not  
167 comprehensive and often reliant on reviews of at-home medication use rather than lived  
168 experiences of pain. Procedural support to allow parents “to track when [their child is] having the  
169 pain and how long it’s been” (Nurse) would provide in-depth information to healthcare teams  
170 and facilitate communication between parents and clinicians. Parents and clinicians also  
171 perceived pain to be better managed in hospital and described a need for connection to the  
172 interdisciplinary team and associated diverse treatment strategies at home. Parents also alluded to  
173 the often overwhelming task of managing pain at home stating, “You panic sometimes when  
174 your child is sick. You’re like, “What's going on? How much [pain medication] do I give? What  
175 do I do?” (Mother of a 4-year-old). The numerous other direct and indirect cancer care tasks for  
176 which parents assumed responsibility—such as medication administration and appointment  
177 tracking—amplified this strain and a tool that could offer emotional support to parents was  
178 considered advantageous.

179 *Recommendations pertaining to pediatric digital health interventions in general*

180 Parents and clinicians made recommendations that might be applied broadly to most  
181 parent-led digital health interventions, beyond just apps targeting pediatric cancer pain. These  
182 features were suggested to enhance intervention usability, credibility, and resultant effectiveness.  
183 Participants particularly noted the need to embed accessibility features in intervention design,

184 emphasizing that these “app[s] should be made as easy as possible so that anybody can use”  
185 (Mother of a 4-year-old). To improve intervention access for parents, participants recommended  
186 that health apps be available in multiple languages, primarily use lay terms for caregivers “who  
187 [are] not in the medical field to understand” (Father of a 6-year-old) and include a text-to-audio  
188 feature and supplemental information that users could review as needed. Participants also  
189 recommended integrating a calendar feature to act as a centralized hub with scheduled  
190 medication and medical appointment reminders, and allow for child symptom tracking. Many  
191 participants also suggested adding gamified elements such as avatars and pictorial  
192 representations. Such gamification was considered to encourage family-oriented digital care by  
193 “making it kid friendly” (Stepmother of a 10-year-old) and would encourage child engagement  
194 in app-based care alongside their caregiver. Specific recommendations related to the use of  
195 avatars were to include features reflective of the parent and child (e.g., diverse skin tones, range  
196 of heights and weights, accessibility features such as glasses and prosthetics).

197         Various features that would enhance the credibility of a digital interventions were also  
198 highlighted. Clinician integration within digital health interventions was considered important.  
199 Considering this integration, participants recommended a software-embedded “threshold for  
200 [symptom] follow-up” (Nurse), that if surpassed, would result in notification to the healthcare  
201 team. Such notifications were suggested to ensure child safety and to build technologies that  
202 enhance, as opposed to replace, care delivered by clinicians. This sharing of app-generated health  
203 reports with clinicians was also considered an important means to support symptom management  
204 by “sort of opening a door to a conversation that maybe [parents and clinicians] wouldn’t have  
205 had” (Oncologist). To enhance credibility, participants also strongly recommended that digital  
206 interventions be based on sound and up-to-date scientific evidence-based and care

207 recommendations be personalized to users, including by implementing software algorithm-based  
208 personalization. Finally, clear descriptions of the limits of clinical support that could be provided  
209 by a digital health intervention should be embedded. Participants highlighted that such  
210 disclaimers would build trust with the intervention by emphasizing when care outside of that  
211 provided by the app should be sought.

212 *Recommendations pertaining to parent-led digital cancer pain management specifically*

213 Participants suggested four categories of priority features for effective caregiver-led  
214 digital pediatric cancer pain management. First, participants suggested the inclusion of a feature  
215 enabling the storage of a child’s pain history, medical history, current medications, allergies,  
216 social history, and family history. This information could be updated by both parents and  
217 clinicians and would support the personalization of pain management advice for a child.

218 Second, suggestions were made related to app-based pain assessments. Both parents and  
219 clinicians strongly recommended multi-dimensional pain assessment tools embedded in the app  
220 to measure pain as a sensory phenomenon (e.g., pain frequency, duration, severity, and cause)  
221 and consider the impact of pain on a child’s affective state and a child’s activities of daily living,  
222 including ability to take medications. App-embedded pain assessments should be valid and  
223 implemented “in a moment when [pain is] actually happening” (Nurse) for the sake of accuracy.  
224 Assessments should also be appropriate to the age, developmental stage, and abilities of the  
225 younger child with cancer and should be repeated once a pain management intervention was  
226 implemented. Therefore, parent proxy assessments should be embedded for children unable to  
227 self-report their pain. Parents also suggested building in capacity to record other aspects of their  
228 child's physical status that may be related to pain (e.g., bowel movement patterns, nausea and  
229 vomiting). Caregivers also discussed the utility of an application that provides developmentally

230 appropriate management advice, specifically citing a need for “proper information for that age  
231 group” (Father of a 5-year-old), whenever pain is reported. Parents felt confident in their abilities  
232 to understand and implement app-based pain management instructions, noting familiarity with  
233 many mobile apps, including health apps, they currently use.

234 Multi-modal physical, psychological, and pharmacological cancer pain management  
235 advice was recommended to be provided to parents. App-integrated physical advice included  
236 “gentle exercise” (Physical therapist) and stretching. Recommended psychological advice was  
237 distraction including “playing” (Father of a 6-year-old), relaxation, and massage, and advice to  
238 emotionally support parents in their role as pain caregivers was also encouraged. Parents  
239 suggested that the app provide medication advice so long as the information presented was  
240 evidenced-based and specific to the context of pediatric cancer. Embedding information on how  
241 to manage medication side effects was also suggested.

242 Fourth, both parents and clinicians expressed a need for a digital intervention to support  
243 the tracking of multidimensional child pain assessment data overtime and provide visual trends  
244 of the data, with the intention of “pick[ing] up patterns” (Oncologist) and supporting family-  
245 clinician conversations on pain. Within the app, parents and clinicians also recommended  
246 tracking which pain management strategies were used, and the effectiveness of each strategy.

#### 247 *Predicted challenges associated with implementing a digital pain management intervention*

248 Although participants cited digital health intervention aspects that were considered  
249 beneficial, predicted challenges were also highlighted. Most prominently, participants discussed  
250 potential difficulty in setting a software-embedded pain threshold beyond which healthcare  
251 provider support would be initiated. Participants specifically discussed the subjective nature of  
252 pain and a resultant need to individualize pain thresholds to each child and their family context.

253 Clinicians discussed the potential for the app to add burden for parents who are already strained  
254 with caregiving tasks for their child; however, several parents considered use of the app,  
255 including once or twice a day, to “be feasible” (Father of a 6-year-old). Clinicians further cited  
256 challenges related to how to successfully integrate app-based data monitoring and pain support  
257 into their daily workflows. In both cases, participants highlighted that the demonstrated positive  
258 impact of the intervention on child pain outcomes must outweigh any burden of use. Participants  
259 also worried that frequent pain monitoring facilitated by the app may lead parents and children to  
260 become acutely aware and subsequently hypersensitized to pain.

261

## 262 **DISCUSSION**

263

264 This study investigated the perspectives of parents of young children with cancer and  
265 pediatric cancer care clinicians as they pertain to the design and delivery of digital health  
266 interventions targeting childrens’ pain. Woven throughout the recommendations were the need  
267 for and value of such pain management interventions, especially in light of the limited at-home  
268 family-led pain management strategies and the often overwhelming nature of managing pain  
269 independently in care settings other than the hospital. Parents and clinicians recommended ways  
270 to improve the usability and credibility of such interventions, including the integration of  
271 accessibility features and ensuring high-quality pain management content is delivered.  
272 Participants recommended needed features for a digital pediatric cancer pain management  
273 intervention including embedded multidimensional assessments of pain, multi-modal pain  
274 management support, and pain tracking over time. Critical to such assessments was the inclusion  
275 of detailed child and family information to support the personalization of provided pain support.

276 Lastly, stakeholders noted perceived challenges associated with such interventions that should be  
277 addressed to enhance utility.

278 Existing literature highlights the critical importance of involving users in the  
279 development and evaluation of apps for specific health conditions, particularly noting the  
280 positive impact on intervention use and effectiveness in achieving an intended health goal (22).  
281 Meaningful stakeholder engagement also enables understanding of the key design features that  
282 will facilitate successful digital interactions, and those features that may limit use (e.g., poor  
283 integration with daily workflows) (22–24).

284 Our study participants reinforced the need for demonstrated usability and credibility  
285 within digital health interventions for children, including those targeting young children’s cancer  
286 pain. Recommendations for accessible language features, the use of lay terms and supplemental  
287 health information, and the use of gamification to engage younger users are supported by the  
288 existing literature (25,26). Research shows that language barriers in healthcare lead to  
289 miscommunication between medical professionals and patients. The implementation of language  
290 accessibility features improves the quality of healthcare delivery and patient safety (27). App  
291 gamification has also been shown to improve the user experience, accessibility, app appeal, user  
292 experience, while also having a positive impact on well-being and health outcomes (28).

293 Our results also show the critical importance of using evidence-based information and  
294 clinician involvement in providing app-based health advice to users. These needed app features  
295 were endorsed by parents and reflect the findings of a recent systematic review that identified  
296 standards for mobile health applications, including that apps should name content authors and  
297 their professional qualifications and utilize scientific evidence as the basis for quality content  
298 (29). Further, participants in our study recommended the implementation of disclaimers in digital



299 health intervention, again aligning with current health app guidance to disclose possible risks to  
300 users and include warnings that apps are not intended to replace health professional care (29).

301         The need to embed a comprehensive multi-dimensional pain assessment tool and multi-  
302 modal integrative pain management advice in the app reflects current considerations for the  
303 management of cancer-related pain. This recommendation reflects a clinical need to implement a  
304 biopsychosocial approach to pain assessment and management, including treating childhood  
305 cancer pain with evidence-based pharmacological, psychological, physical, and complementary  
306 and alternative medicine techniques (1). Consideration of the time to complete comprehensive  
307 assessments is also needed as previous research in pediatric cancer pain apps has shown lengthy  
308 questionnaires to be a drawback to app use (13).

309         Predicted challenges associated with digital health interventions identified in our study  
310 include the potential for the app to burden parents and clinicians. Digital burden has been  
311 described previously and studies of high-burden apps often experience high participant attrition  
312 rooted in the fundamental challenges of keeping participants engaged in intervention use (30).  
313 Difficulties in setting app-based pain thresholds for the initiation of clinician-driven pain  
314 management support require the application of a personalized approach to pain care (31) and a  
315 need to further tailor co-designed digital interventions to the needs of unique users and contexts.  
316 (32)

317         Strengths of our study include the integration of multiple stakeholders' perspectives and  
318 our collection of data from two pediatric cancer care centers. Limitations include potential social  
319 desirability response bias whereby parents and clinicians may have withheld negative reports  
320 about the app concept during interviews with our team and we did obtain the necessary  
321 purposive sample. However, participants were informed that all feedback would be valued

322 equally. Additionally, the mode by which we conducted interviews was not standardized due to  
323 the COVID-19 pandemic and we instead held interviews via telephone, online, and in-person.  
324 However, research shows good comparability between the content and depth of interviews  
325 conducted in-person and otherwise (33,34). Finally, we did not conduct participant checking of  
326 either the transcriptions or final thematic analysis.

327         This study provides recommendations from key stakeholders on the design and delivery  
328 of digital pediatric cancer pain interventions, which can be readily used by parents, clinicians,  
329 engineers, and researchers participating in intervention development. Further, several  
330 recommendations gleaned from this process are directly applicable to the design of many  
331 pediatric digital health interventions—including those beyond childhood cancer pain. We  
332 recommend that future investigators engaged in developing health apps implement a co-design  
333 approach within their work. Such participation can reveal critical requirements for intervention  
334 design that result in relevance of app content and enhanced clinical effectiveness. The  
335 recommendations gathered in the present study will become the design principles of our future  
336 childhood cancer pain digital research.

337

## 338 **MATERIALS AND METHODS**

339

340 Our reporting is in accordance with the Consolidated Criteria for Reporting Qualitative Research  
341 (COREQ) (15) and Guidance for Reporting Involvement of Patients and the Public—Short Form  
342 (GRIPP2-SF) (16).

343 *Study Approach, Setting and Participants*

344 We used an inductive, qualitative descriptive approach for healthcare research (17),  
345 consistent with our goal to understand stakeholder's pain app perceptions and requirements. We  
346 recruited participants from the Hospital for Sick Children (SickKids) in Toronto, Ontario,  
347 Canada and the Children's Hospital of Orange County (CHOC) in Orange, California, United  
348 States. We enrolled English-speaking parents who were the primary caregiver of a child (2-11  
349 years) receiving treatment for any cancer diagnosis and who spent at least 25% of their cancer-  
350 care treatment time outside of the hospital and who had pain of any intensity in the preceding  
351 week. Child pain was determined by caregiver proxy-report. English-speaking multidisciplinary  
352 clinicians were included if they worked within the hematology/oncology program at either  
353 hospital and provided direct pain-related care to children spending at least 25% of their time  
354 during cancer treatment at home. We employed a purposive maximum variation sampling  
355 strategy with the aim of including parents who varied in age, sex, ethnicity, and their child's  
356 diagnosis, and clinicians who varied by healthcare profession.

### 357 *Data Collection*

358 Following ethics board approval at both sites, we obtained informed consent from  
359 participants. Participants were asked to complete demographic questionnaires and parents  
360 completed a Parental Pain Expression Perceptions (PPEP). The PPEP is a valid and reliable 9-  
361 item Likert-type scale-based questionnaire that assesses parents' knowledge and attitudes about  
362 pain expression in children, where higher scores represent greater misconceptions about pain  
363 expression (18).

364 Individual in-hospital, telephone, or online face-to-face semi-structured interviews were  
365 conducted by trained research team members (AC, HGP, LBT) with no previous relationship to  
366 participants. Our interview guide was based on the currently developed Pain Squad+ pain

367 management app for adolescents with cancer (19) and a study of salient home-based pediatric  
368 cancer care issues (20). We audio-recorded all interviews and handwritten field-notes were  
369 taken. We conducted interviews concurrent with our analyses until themes relevant to the study's  
370 aim reached saturation.

### 371 *Data Analysis*

372 Interview audio-recordings were transcribed into electronic documents and uploaded to  
373 NVivo software version 11.4.0. Using an inductive approach, transcripts were coded with  
374 reference to field-notes by four independent research assistants (SS, KH, TM, and MZ).  
375 Following the method of Braun and Clarke (21), we read through the dataset multiple times and  
376 discussed its features as a group before creating several coding categories. Coding proceeded  
377 using a statement-by-statement approach and codes were organized into themes and subthemes.  
378 The creation of themes was an iterative process where themes were continuously reviewed and  
379 compared against the narrative exemplars until a final thematic framework was established. The  
380 research team (SS, KH, TM, and LJ) met multiple times to ensure themes were accurately  
381 reflective of participant narratives, and consensus building exercises were used to refine themes  
382 and subthemes where needed.

383

### 384 **Acknowledgements**

385 We would like to thank our parent and clinician participants for kindly taking the time to  
386 share their experiences and perceptions related to the design and development of a future app.  
387 We would also like to thank Alyssandra Chee-a-tow for her invaluable assistance with  
388 interviewing.

389

390 **References**

- 391 1. Loeffen EAH, Mulder RL, Font-Gonzalez A, Leroy PLJM, Dick BD, Taddio A, et al.  
392 Reducing pain and distress related to needle procedures in children with cancer: A clinical  
393 practice guideline. *European Journal of Cancer*. 2020 May 1;131:53–67.
- 394 2. Loeffen EAH, Kremer LCM, Wetering MD van de, Mulder RL, Font-Gonzalez A, Dupuis LL,  
395 et al. Reducing pain in children with cancer: Methodology for the development of a clinical  
396 practice guideline. *Pediatric Blood & Cancer*. 2019 Mar 7;46(3):e27698.
- 397 3. Schulte FSM, Patton M, Alberts NM, Kunin-Batson A, Olson-Bullis BA, Forbes C, et al. Pain  
398 in long-term survivors of childhood cancer: A systematic review of the current state of  
399 knowledge and a call to action from the Children’s Oncology Group. *Cancer*. 2021;127(1):35–  
400 44.
- 401 4. Tutelman PR, Chambers CT, Urquhart R, Fernandez CV, Heathcote LC, Noel M, et al. When  
402 “a headache is not just a headache”: A qualitative examination of parent and child experiences of  
403 pain after childhood cancer. *Psycho Oncol*. 2019 Jul 5;28(9):1901–9.
- 404 5. Stinson JN, Jibb LA, Nguyen C, Nathan PC, Maloney AM, Dupuis LL, et al. Construct  
405 validity and reliability of a real-time multidimensional smartphone app to assess pain in children  
406 and adolescents with cancer. *Pain*. 2015 Dec;156(12):2607–15.
- 407 6. Barbera L, Taylor C, Dudgeon D. Why do patients with cancer visit the emergency  
408 department near the end of life? *Canadian Medical Association Journal*. 2010 Apr 5;182(6):563–  
409 8.
- 410 7. Fortier MA, Wahi A, Bruce C, Maurer EL, Stevenson R. Pain management at home in  
411 children with cancer: a daily diary study. *Pediatric Blood & Cancer*. 2014 Jun;61(6):1029–33.
- 412 8. Jibb LA, Stevens BJ, Nathan PC, Seto E, Cafazzo JA, Johnston DL, et al. Implementation and  
413 preliminary effectiveness of a real-time pain management smartphone app for adolescents with  
414 cancer: a multicenter pilot clinical study. *Pediatric Blood & Cancer*. 2017 Oct;64(10):e26554.
- 415 9. Tiozzo E, Fondi S, Biagioli V, Piccinelli E, Alibrandi F, Gawronski O, et al. Electronic  
416 Assessment and Tracking of Pain at Home: A Prospective Study in Children With Hematologic  
417 or Solid Tumors. *J Pediatr Oncol Nurs*. 2021;38(2):82–93.
- 418 10. Fortier MA, Chung WW, Martinez A, Gago-Masague S, Sender L. Pain buddy: A novel use  
419 of m-health in the management of children’s cancer pain. *Computers in Biology and Medicine*.  
420 2016 Sep 1;76:202–14.
- 421 11. Greenhalgh T, Hinton L, Finlay T, Macfarlane A, Fahy N, Clyde B, et al. Frameworks for  
422 supporting patient and public involvement in research: Systematic review and co-design pilot.  
423 *Health Expectations Int J Public Participation Health Care Health Policy*. 2019;22(4):785–801.

- 424 12. Teychenne M, Apostolopoulos M, Ball K, Olander EK, Opie RS, Rosenbaum S, et al. Key  
425 stakeholder perspectives on the development and real-world implementation of a home-based  
426 physical activity program for mothers at risk of postnatal depression: a qualitative study. *Bmc*  
427 *Public Health*. 2021;21(1):361.
- 428 13. Jibb LA, Stevens BJ, Nathan PC, Seto E, Cafazzo JA, Johnston DL, et al. Perceptions of  
429 adolescents with cancer related to a pain management app and its evaluation: qualitative study  
430 nested within a multicenter pilot feasibility study. *JMIR mhealth and uhealth*. 2018 Apr  
431 6;6(4):e80.
- 432 14. Bird M, McGillion M, Chambers EM, Dix J, Fajardo CJ, Gilmour M, et al. A generative co-  
433 design framework for healthcare innovation: development and application of an end-user  
434 engagement framework. *Res Involv Engagem*. 2021;7(1):12.
- 435 15. Tong A, Sainsbury P, Craig J. Consolidated criteria for reporting qualitative research  
436 (COREQ): a 32-item checklist for interviews and focus groups. *International Journal for Quality*  
437 *in Health Care*. 2007 Dec;19(6):349–57.
- 438 16. Staniszewska S, Brett J, Simera I, Seers K, Mockford C, Goodlad S, et al. GRIPP2 reporting  
439 checklists: tools to improve reporting of patient and public involvement in research. *British*  
440 *Medical Journal*. 2017 Aug 2;358:j3453.
- 441 17. Bradshaw C, Atkinson S, Doody O. Employing a Qualitative Description Approach in Health  
442 Care Research. *Global Qual Nurs Res*. 2017;4:2333393617742282.
- 443 18. Zisk RY, Grey M, MacLaren JE, Kain ZN. Exploring Sociodemographic and Personality  
444 Characteristic Predictors of Parental Pain Perceptions. *Anesthesia and analgesia*. 2007 Apr  
445 1;104(4):790–8.
- 446 19. Jibb LA, Stevens BJ, Nathan PC, Seto E, Cafazzo JA, Stinson JN. A smartphone-based pain  
447 management app for adolescents with cancer: establishing system requirements and a pain care  
448 algorithm based on literature review, interviews, and consensus. *JMIR Research Protocols*.  
449 2014;3(1):e15.
- 450 20. Jibb LA, Chartrand J, Masama T, Johnston DL. Home-Based Pediatric Cancer Care:  
451 Perspectives and Improvement Suggestions From Children, Family Caregivers, and Clinicians.  
452 *Jco Oncol Pract*. 2021;17(6):e827–39.
- 453 21. Braun V, Clarke V. Using thematic analysis in psychology. *Qualitative Research in*  
454 *Psychology*. 2006 Jan;3(2):77–101.
- 455 22. Powell L, Joddrell P, Parker J. Involving Users in the Evaluation of Apps for Specific Health  
456 Conditions. *Stud Health Technol*. 2017;242:646–53.

- 457 23. Floch J, Zettl A, Fricke L, Weisser T, Grut L, Vilarinho T, et al. User Needs in the  
458 Development of a Health App Ecosystem for Self-Management of Cystic Fibrosis: User-  
459 Centered Development Approach. *Jmir Mhealth Uhealth*. 2018;6(5):e113.
- 460 24. Rodriguez DV, Lawrence K, Luu S, Yu JL, Feldthouse DM, Gonzalez J, et al. Development  
461 of a computer-aided text message platform for user engagement with a digital Diabetes  
462 Prevention Program: a case study. *J Am Medical Informatics Assoc Jamia*. 2021;29(1):155–62.
- 463 25. Muñoz AO, Camacho E, Torous J. Marketplace and Literature Review of Spanish Language  
464 Mental Health Apps. *Frontiers Digital Heal*. 2021;3:615366.
- 465 26. Fijačko N, Gosak L, Cilar L, Novšak A, Creber RM, Skok P, et al. The Effects of  
466 Gamification and Oral Self-Care on Oral Hygiene in Children: Systematic Search in App Stores  
467 and Evaluation of Apps. *Jmir Mhealth Uhealth*. 2020;8(7):e16365.
- 468 27. Gerchow L, Burka LR, Miner S, Squires A. Language Barriers Between Nurses and Patients:  
469 A Scoping Review. *Patient Educ Couns*. 2020;104(3):534–53.
- 470 28. Johnson D, Deterding S, Kuhn KA, Staneva A, Stoyanov S, Hides L. Gamification for health  
471 and wellbeing: A systematic review of the literature. *Internet Interventions*. 2016;6:89–106.
- 472 29. Llorens-Vernet P, Miró J. Standards for Mobile Health-Related Apps: Systematic Review  
473 and Development of a Guide. *Jmir Mhealth Uhealth*. 2020;8(3):e13057.
- 474 30. Amagai S, Pila S, Kaat AJ, Nowinski CJ, Gershon RC. Challenges in Participant  
475 Engagement and Retention Using Mobile Health Apps: Literature Review. *J Med Internet Res*.  
476 2022;24(4):e35120.
- 477 31. Cohen SP, Vase LV, Hooten W. Chronic pain: an update on burden, best practices, and new  
478 advances. *Lancet*. 2021 May; 397(10289):2082-2097.
- 479 32. Arigo D, Suls J. Smartphone apps providing social comparison for health behavior change: a  
480 need for better tailoring to person and context. *Mhealth*. 2018 Oct; 4: 46.
- 481 33. Woodyatt CR, Finneran CA, Stephenson R. In-Person Versus Online Focus Group  
482 Discussions: A Comparative Analysis of Data Quality. *Qual Health Res*. 2016;26(6):741–9.
- 483 34. Sturges JE, Hanrahan KJ. Comparing Telephone and Face-to-Face Qualitative Interviewing:  
484 a Research Note. *Qualitative Research*. 2004 Apr 1;4(1):107–18.
- 485
